# Supplementary material for: Distinct tissue-specific transcriptional regulation revealed by gene regulatory networks in maize
Source: PubMed Central journal article supplement (PMC6040155; doi:10.1186/s12870-018-1329-y), 2018-06-07

# Additional file 12

**A** TF Degree Centrality in Leaf

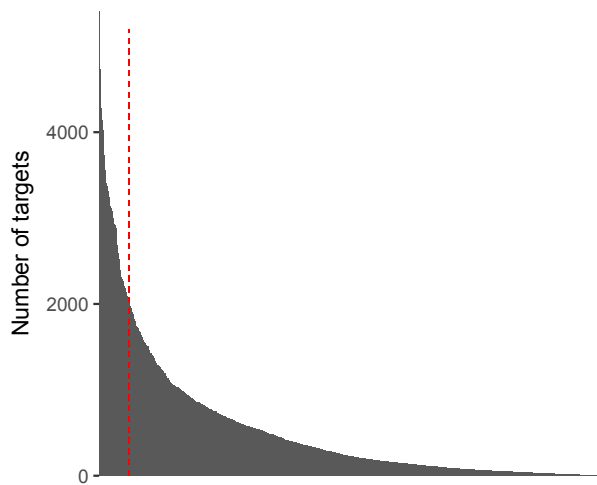

**B** TF Degree Centrality in Root

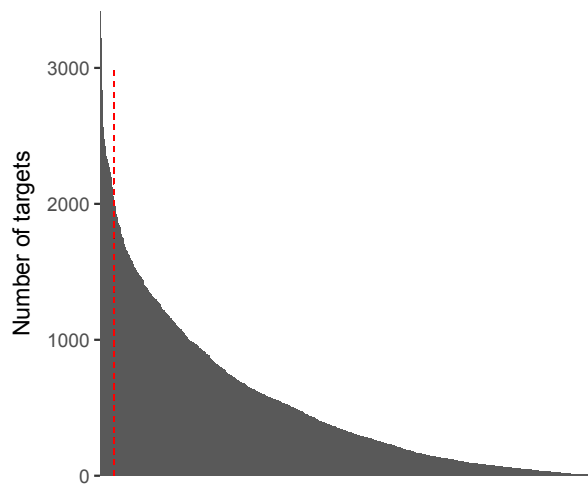

**C** TFs in Leaf  
TF Degree Centrality in SAM

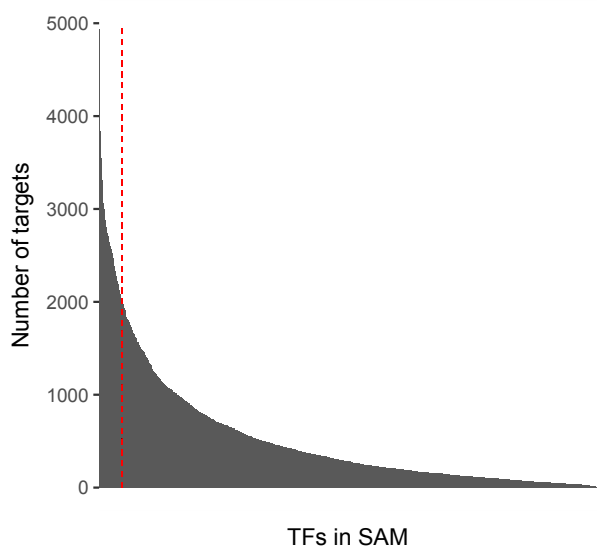

**D** TFs in Root  
TF Degree Centrality in Seed

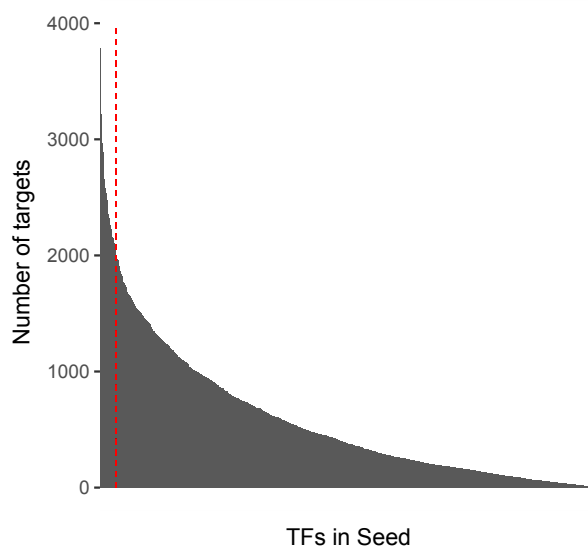

Supplement: 12870_2018_1329_MOESM12_ESM.pdf [file 12870_2018_1329_MOESM12_ESM.pdf]
