# Supplementary material for: Distinct tissue-specific transcriptional regulation revealed by gene regulatory networks in maize
Source: BMC Plant Biol. 2018 Jun 7;18:111. doi: 10.1186/s12870-018-1329-y (PMC6040155; doi:10.1186/s12870-018-1329-y)
Supplement: Supplementary file 3 — Evaluation of tissue GRNs generated by MRNET and CLR. (XLSX 9 kb) [file 12870_2018_1329_MOESM3_ESM.xlsx]

## Sheet: Sheet1
Additional file 3. Evaluation of tissue GRNs generated by MRNET and CLR.
Method: MRNET
KN1	AUROC	AUPR		FEA4	AUROC	AUPR		O2	AUROC	AUPR
random	0.5	0.108		random	0.5	0.103		random	0.5	0.061
SAM	0.59	0.177		leaf	0.51	0.157		seed	0.528	0.076
seed	0.558	0.201		root	0.568	0.165
				SAM	0.514	0.151
				seed	0.547	0.172
Method: CLR
KN1	AUROC	AUPR		FEA4	AUROC	AUPR		O2	AUROC	AUPR
random	0.5	0.108		random	0.5	0.103		random	0.5	0.061
SAM	0.55	0.191		leaf	0.548	0.183		seed	0.524	0.079
seed	0.562	0.212		root	0.571	0.174
				SAM	0.519	0.159
				seed	0.551	0.183
